# Supplementary material for: d-Mannose for Prevention of Recurrent Urinary Tract Infection Among Women: A Randomized Clinical Trial
Source: PubMed Central journal article supplement (PMC11002776; doi:10.1001/jamainternmed.2024.0264), 2024-04-08
Supplement: jamainternmed-e240264-s004.pdf [file jamainternmed-e240264-s004.pdf]

## Data Sharing Statement

Hayward. d-Mannose for Prevention of Recurrent Urinary Tract Infection Among Women. *JAMA Intern Med.* Published April 08, 2024. doi:10.1001/jamainternmed.2024.0264

### Data

**Data available:** Yes

**Data types:** Deidentified participant data

**How to access data:** Requests for de-identified participant level data collected during this study should be made to the Nuffield Department of Primary Care hosted Datasets Independent Scientific Committee (PrimDISC): [primdisc@phc.ox.ac.uk](mailto:primdisc@phc.ox.ac.uk). Data will be released following review and approval by PrimDISC of a protocol, statistical analysis plan and the signing of a suitable data sharing agreement.

**When available:** With publication
